# Supplementary material
Source: ML conference proceedings conference paper supplement (https://openreview.net/forum?id=BSxlyw8sce9)

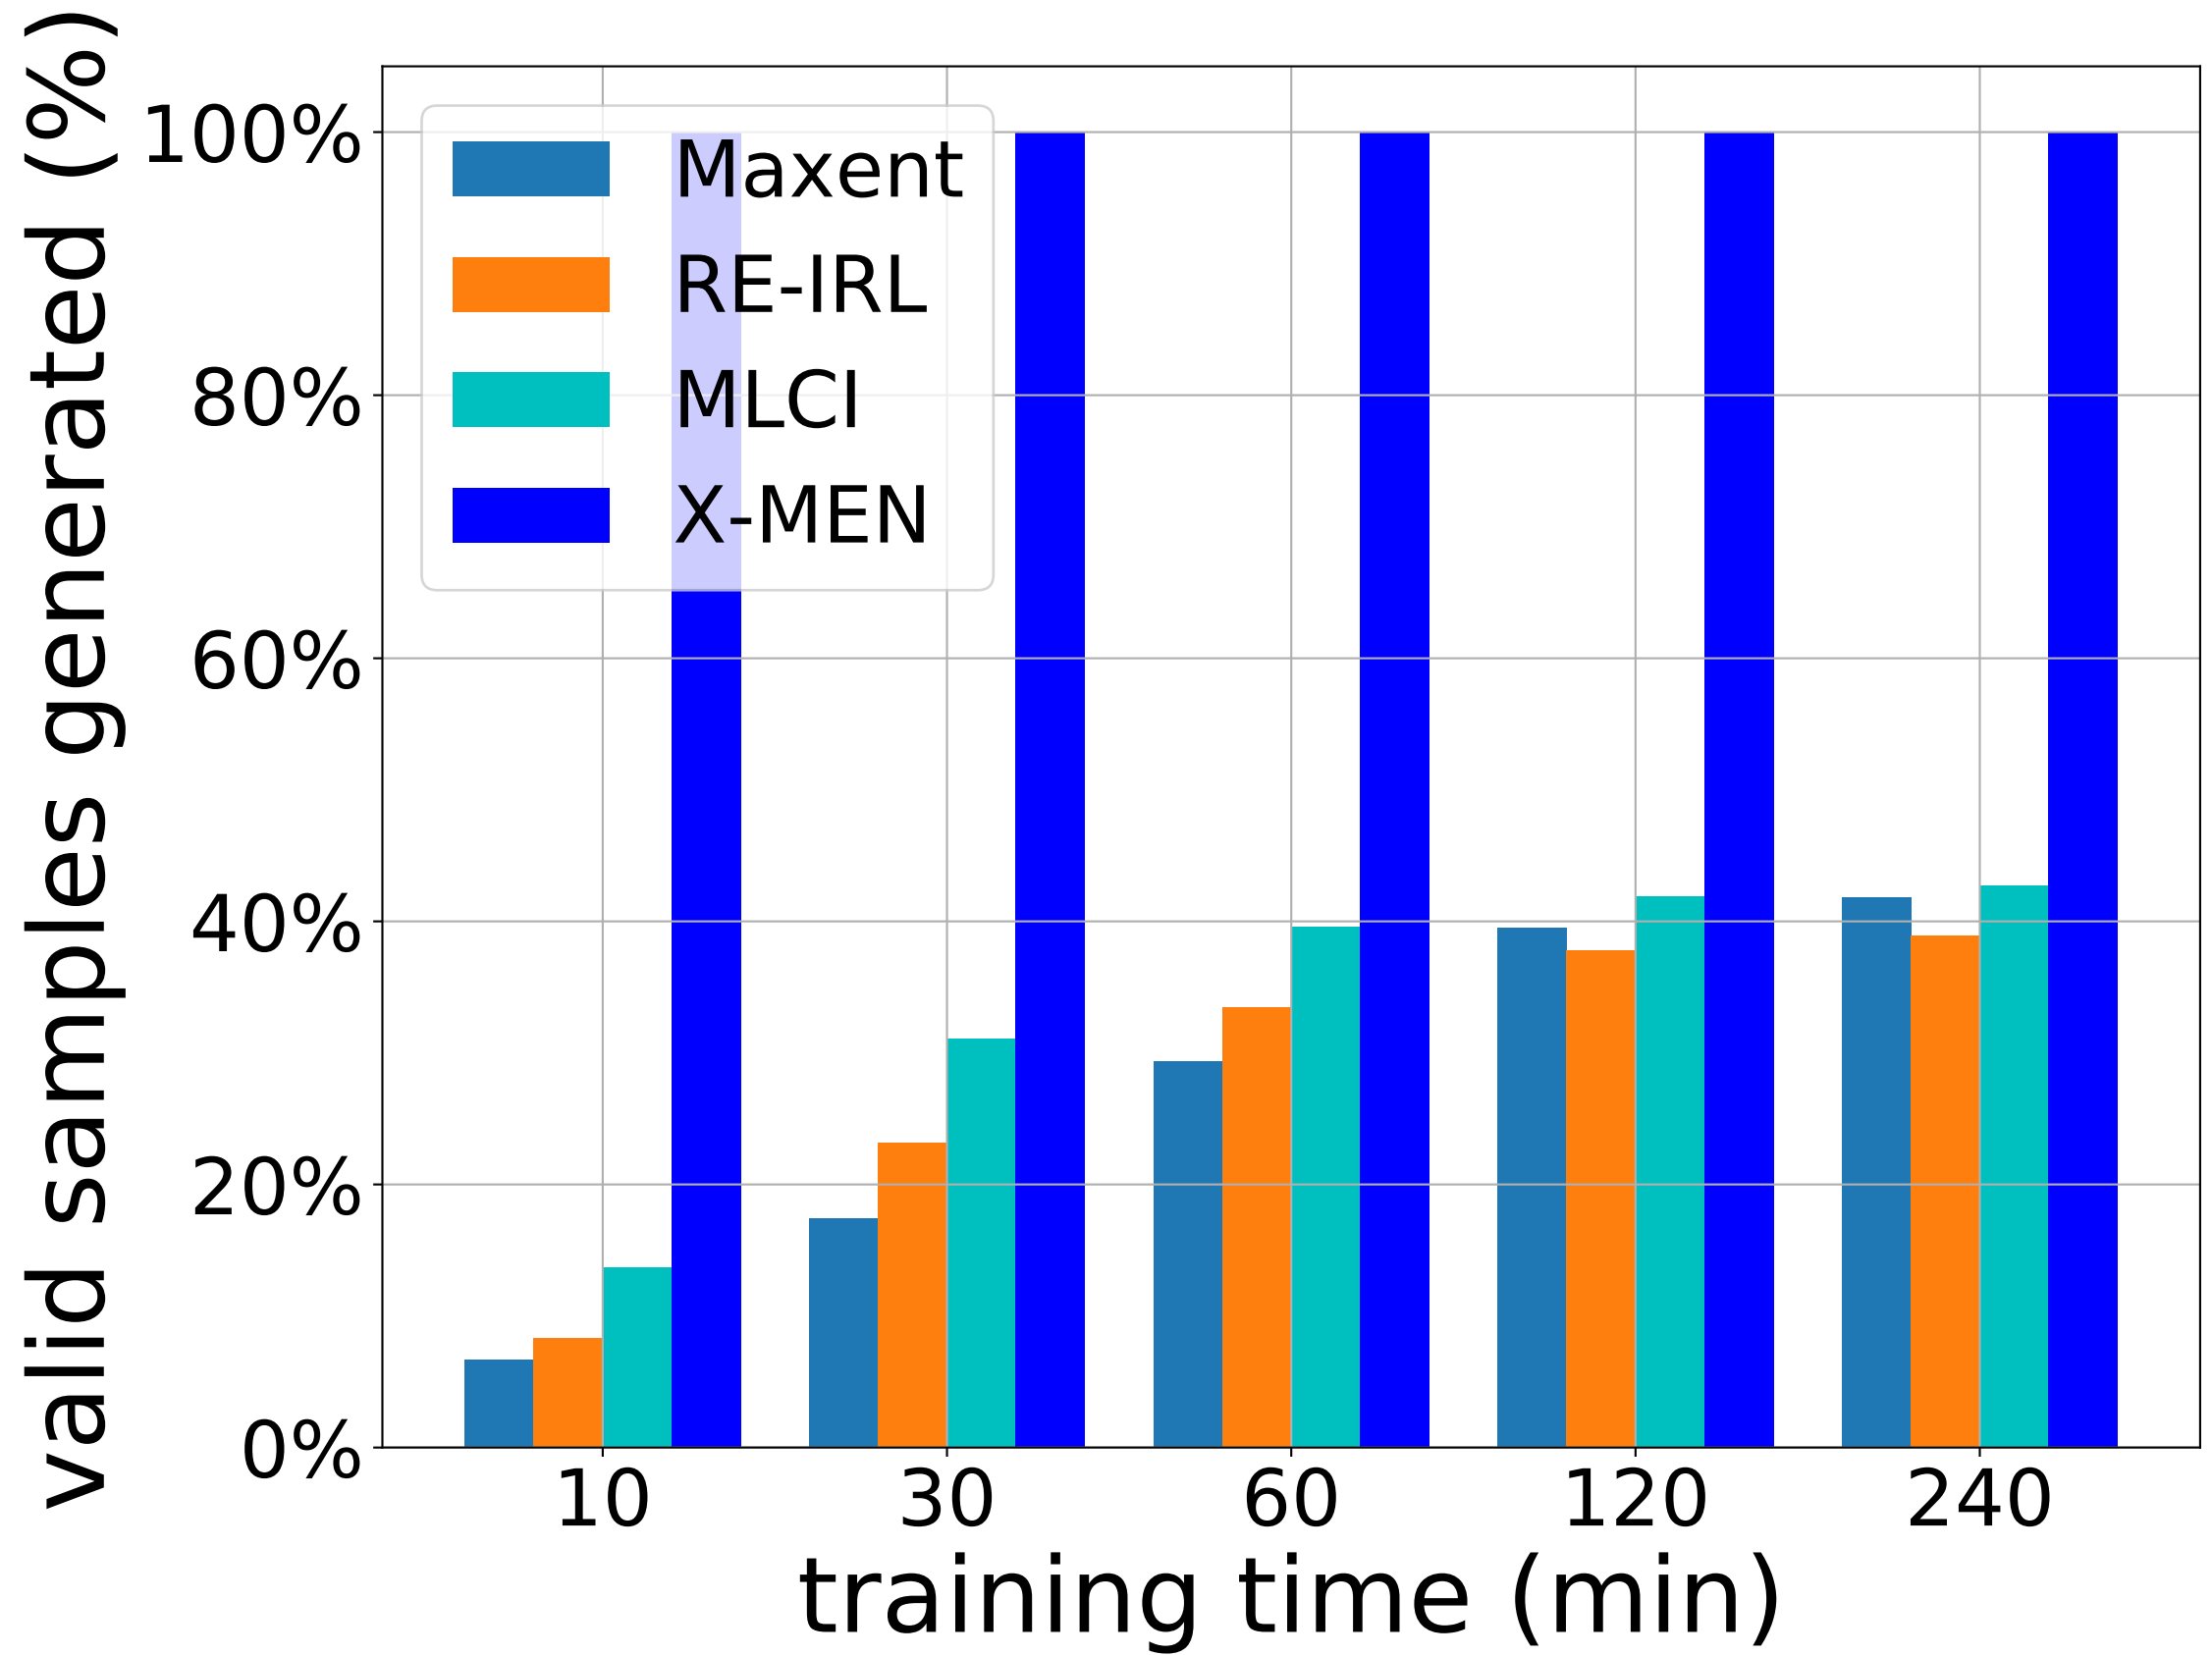

Supplement: supplementary_material [file attachment]

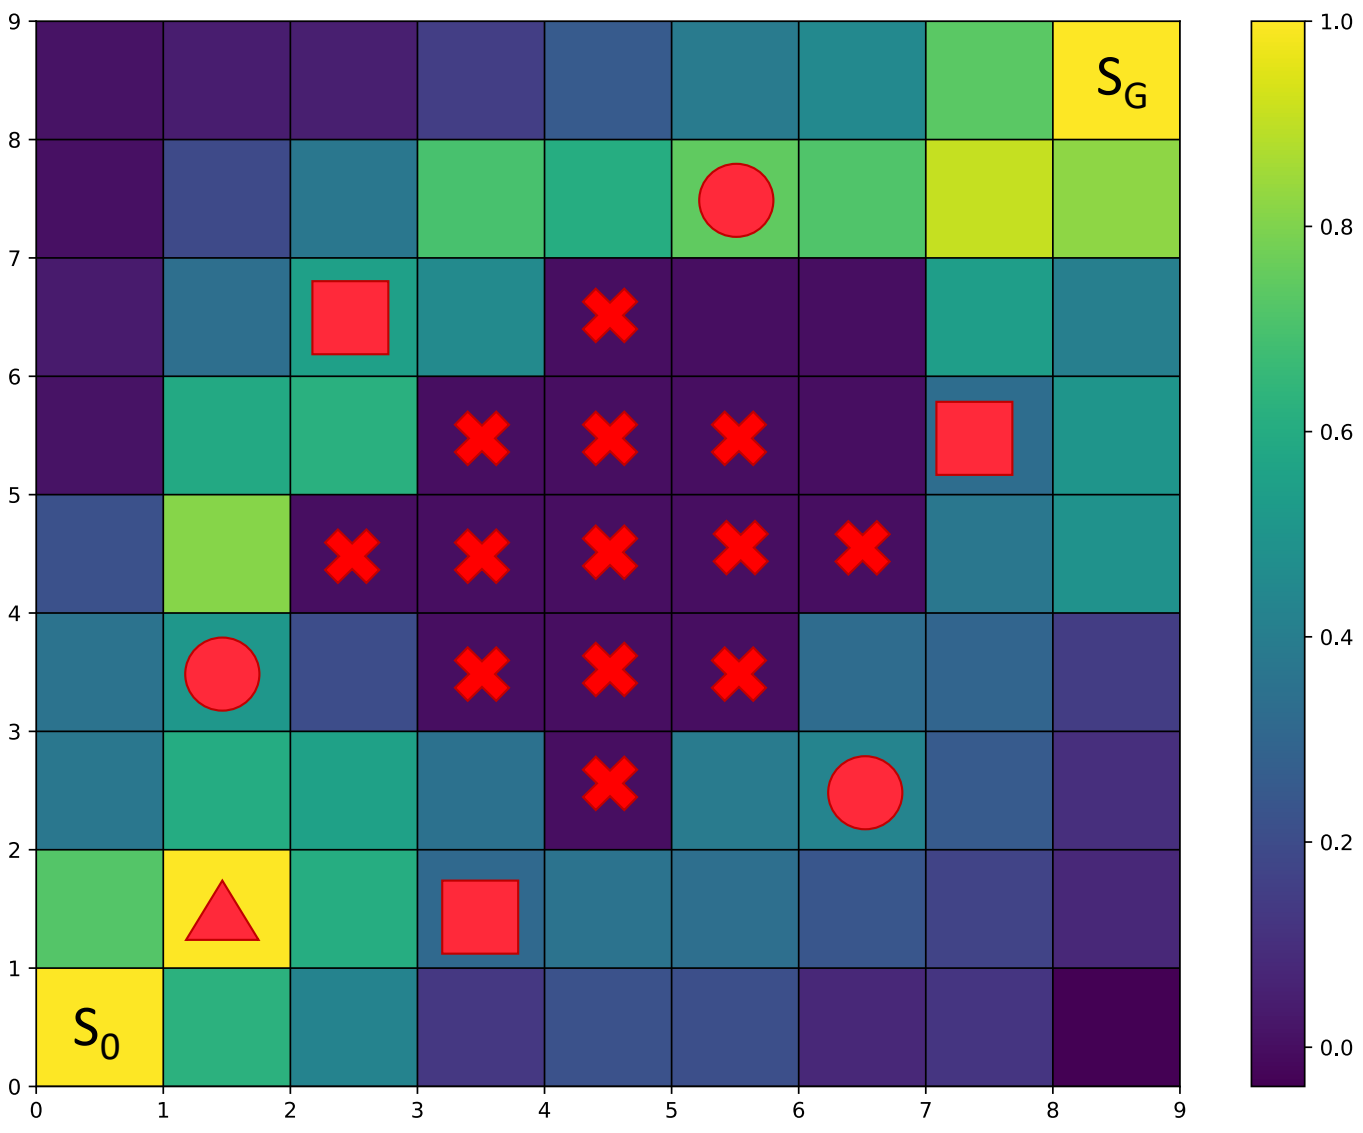

Supplement: supplementary_material [file attachment]

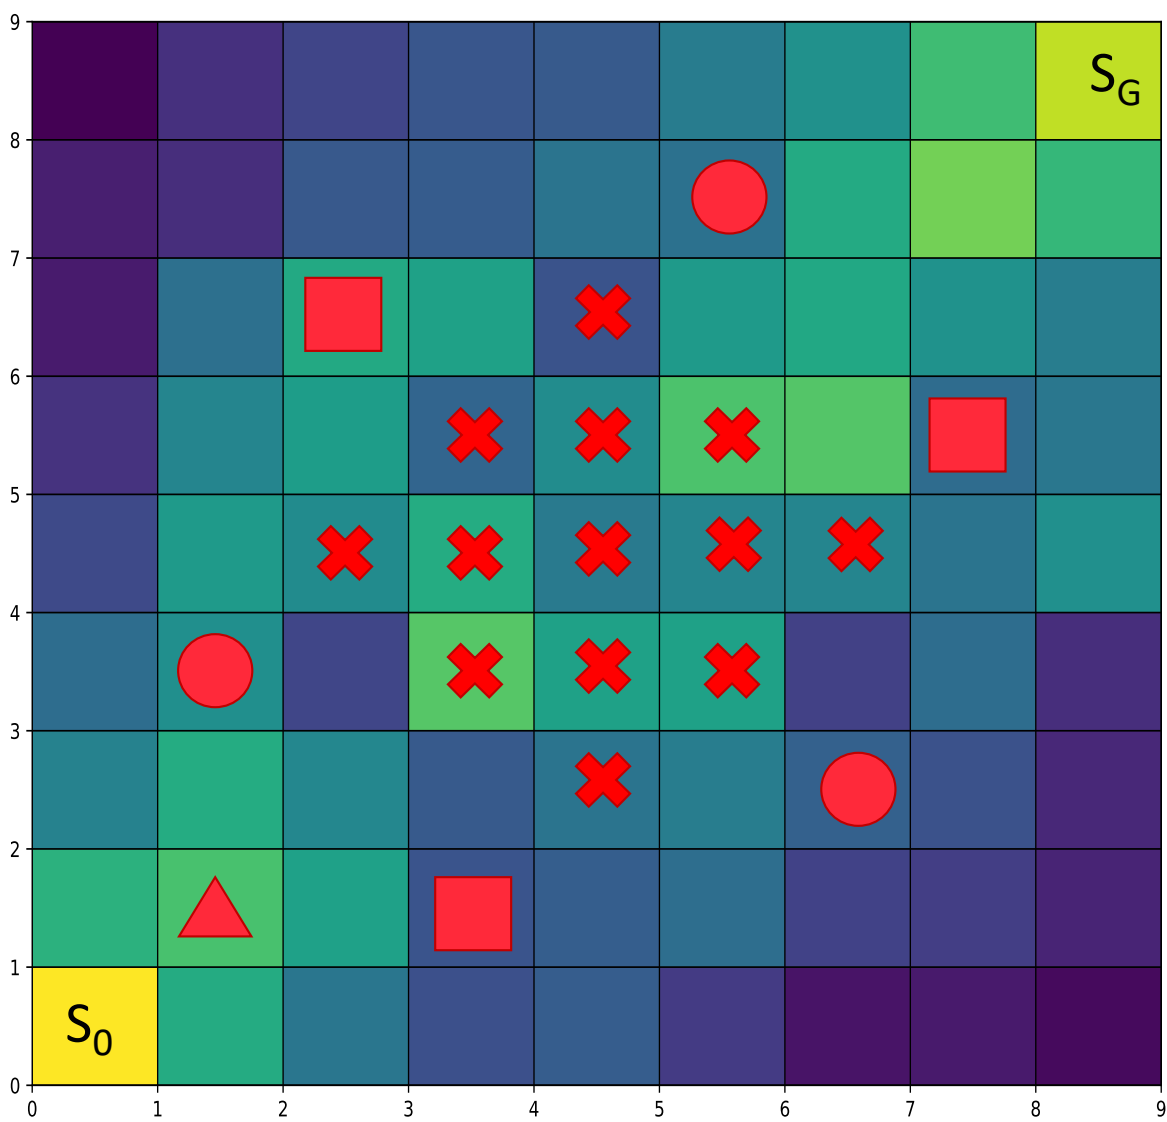

Supplement: supplementary_material [file attachment]

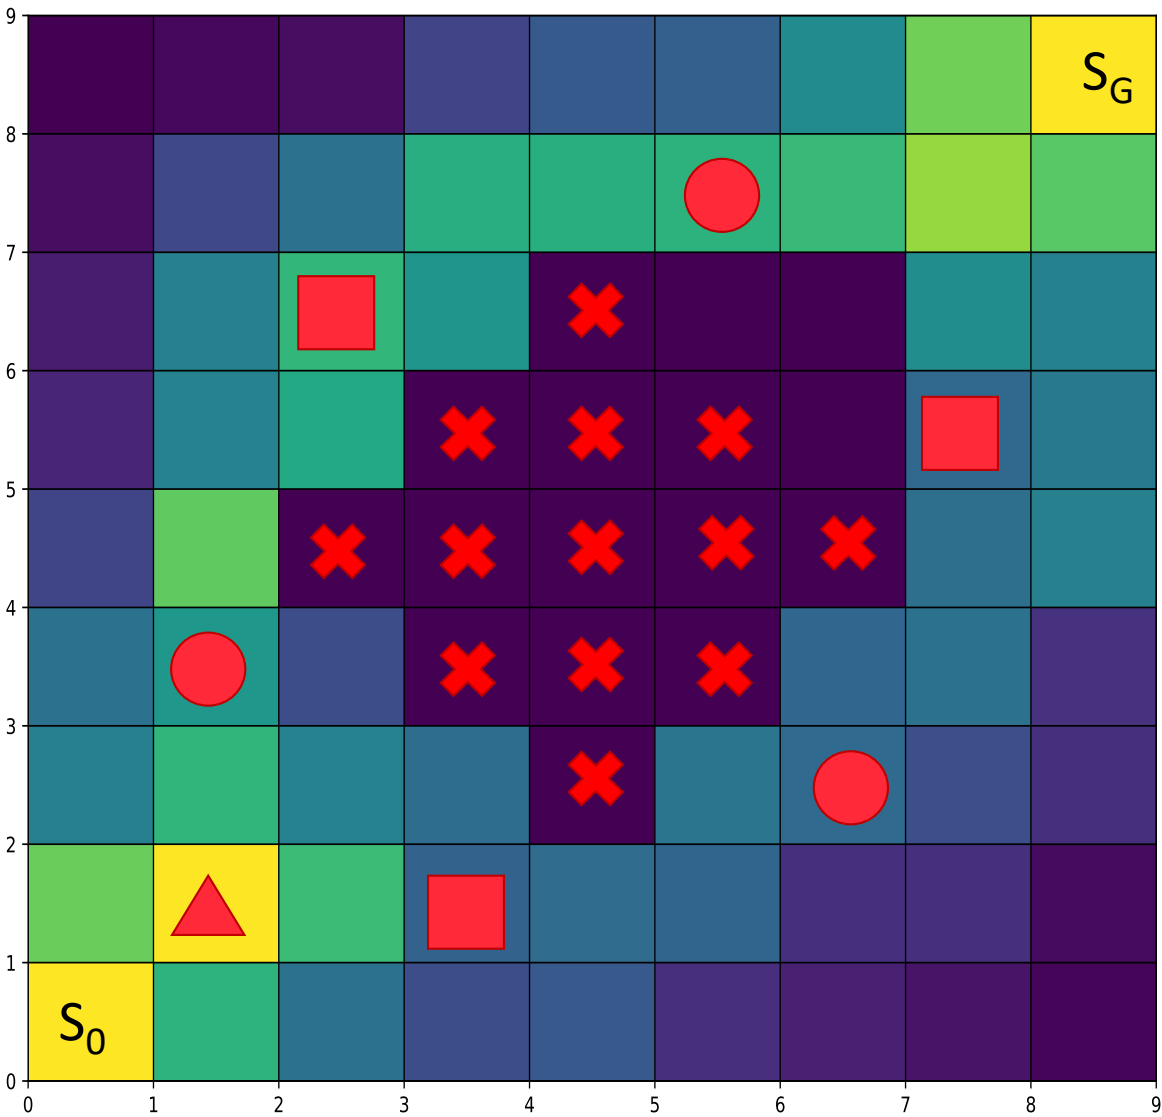

Supplement: supplementary_material [file attachment]

Goal state ( $S_G$ )

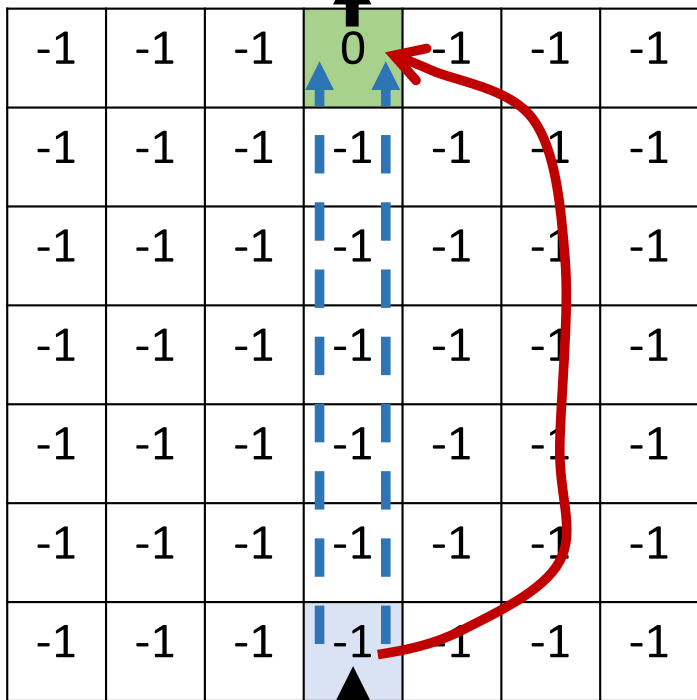

Start state ( $S_0$ )

Supplement: supplementary_material [file attachment]

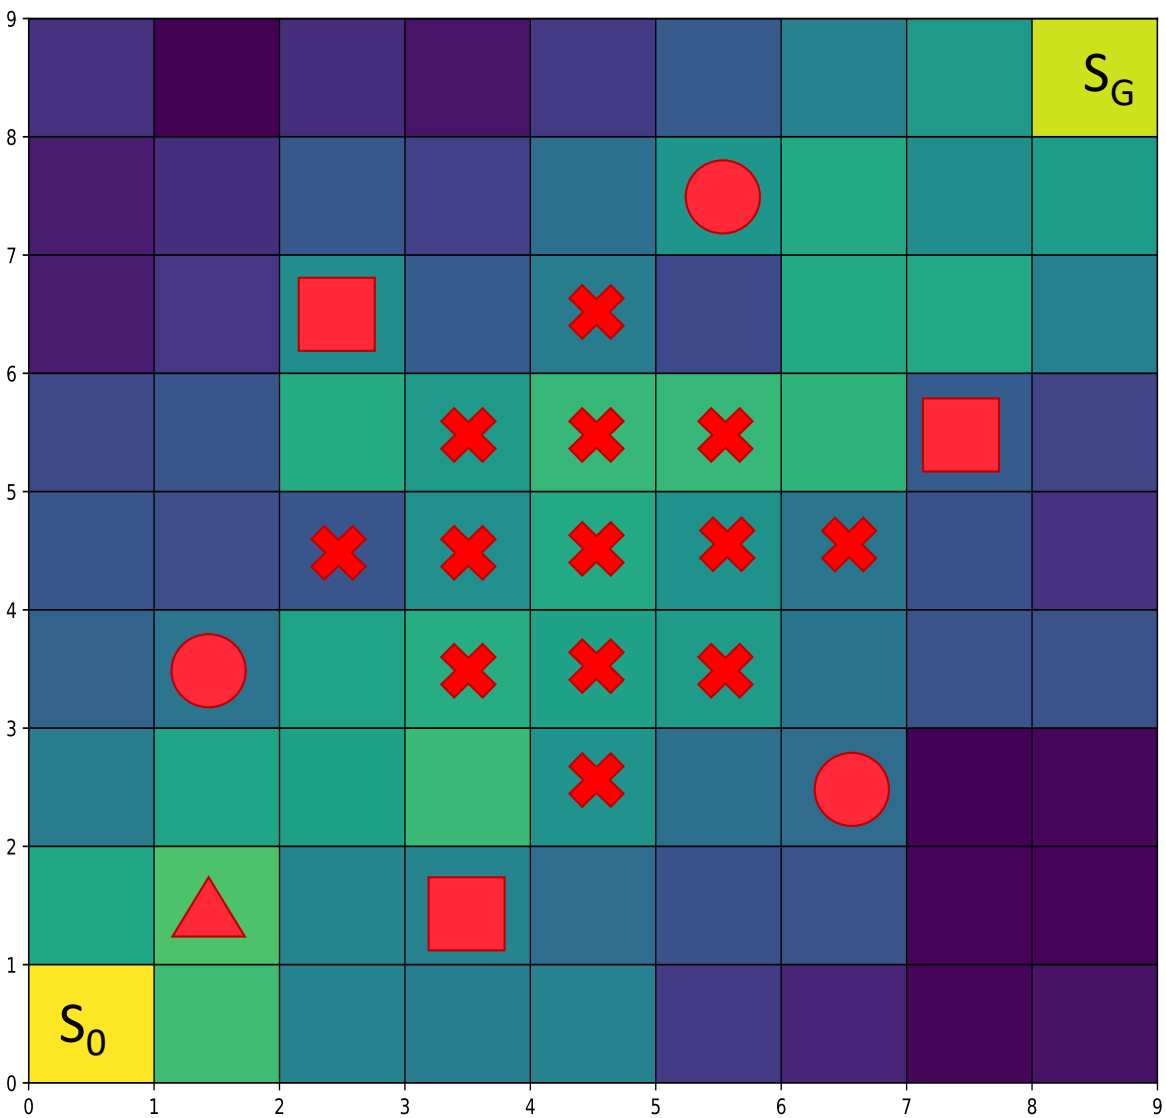

Supplement: supplementary_material [file attachment]

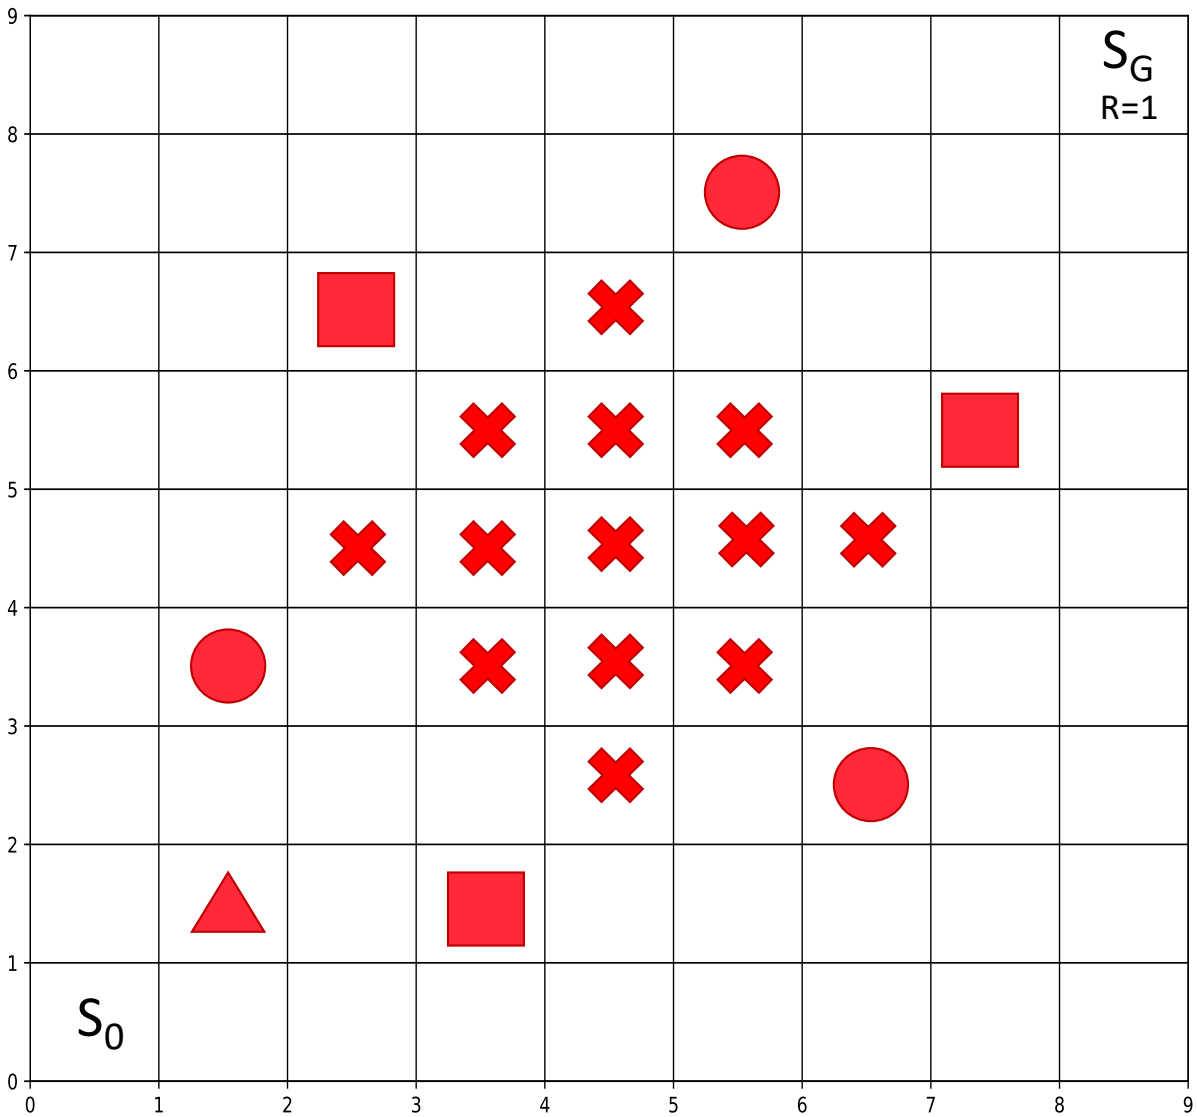

Supplement: supplementary_material [file attachment]

Goal state ( $S_G$ )

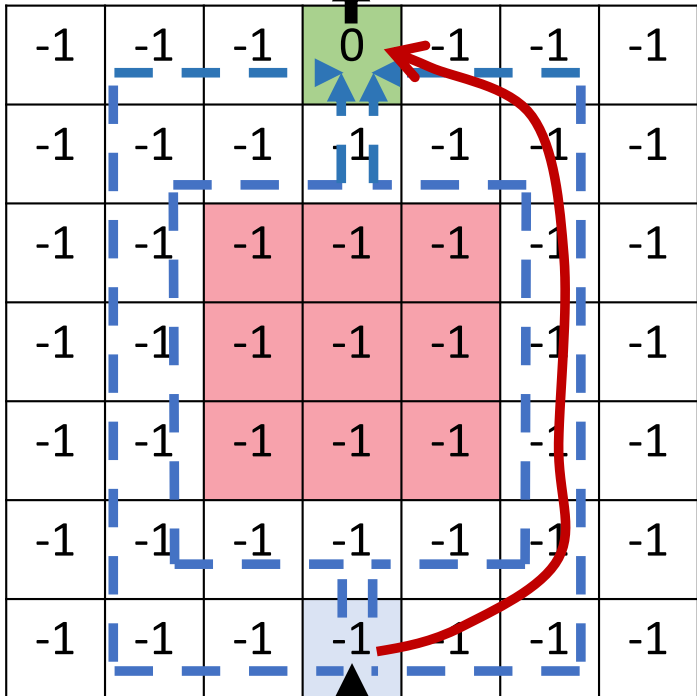

Start state ( $S_0$ )

Supplement: supplementary_material [file attachment]

Goal state ( $S_G$ )

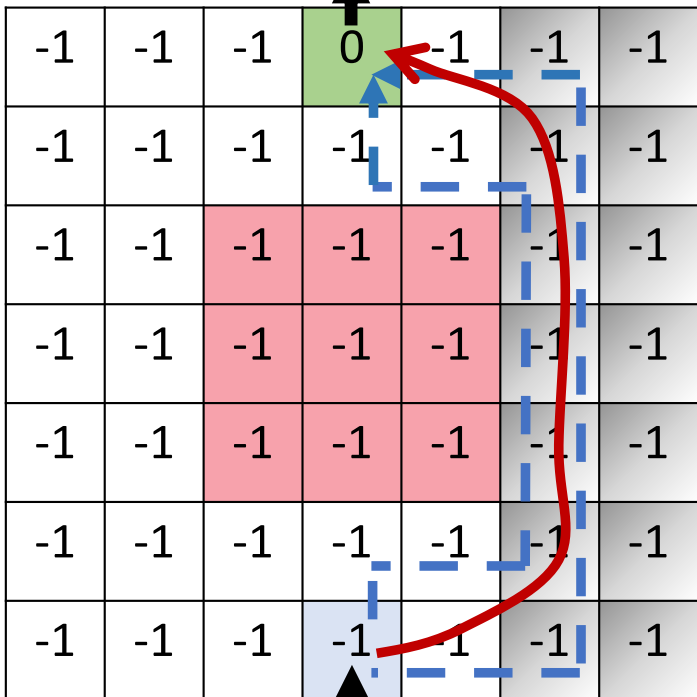

Start state ( $S_0$ )

Supplement: supplementary_material [file attachment]

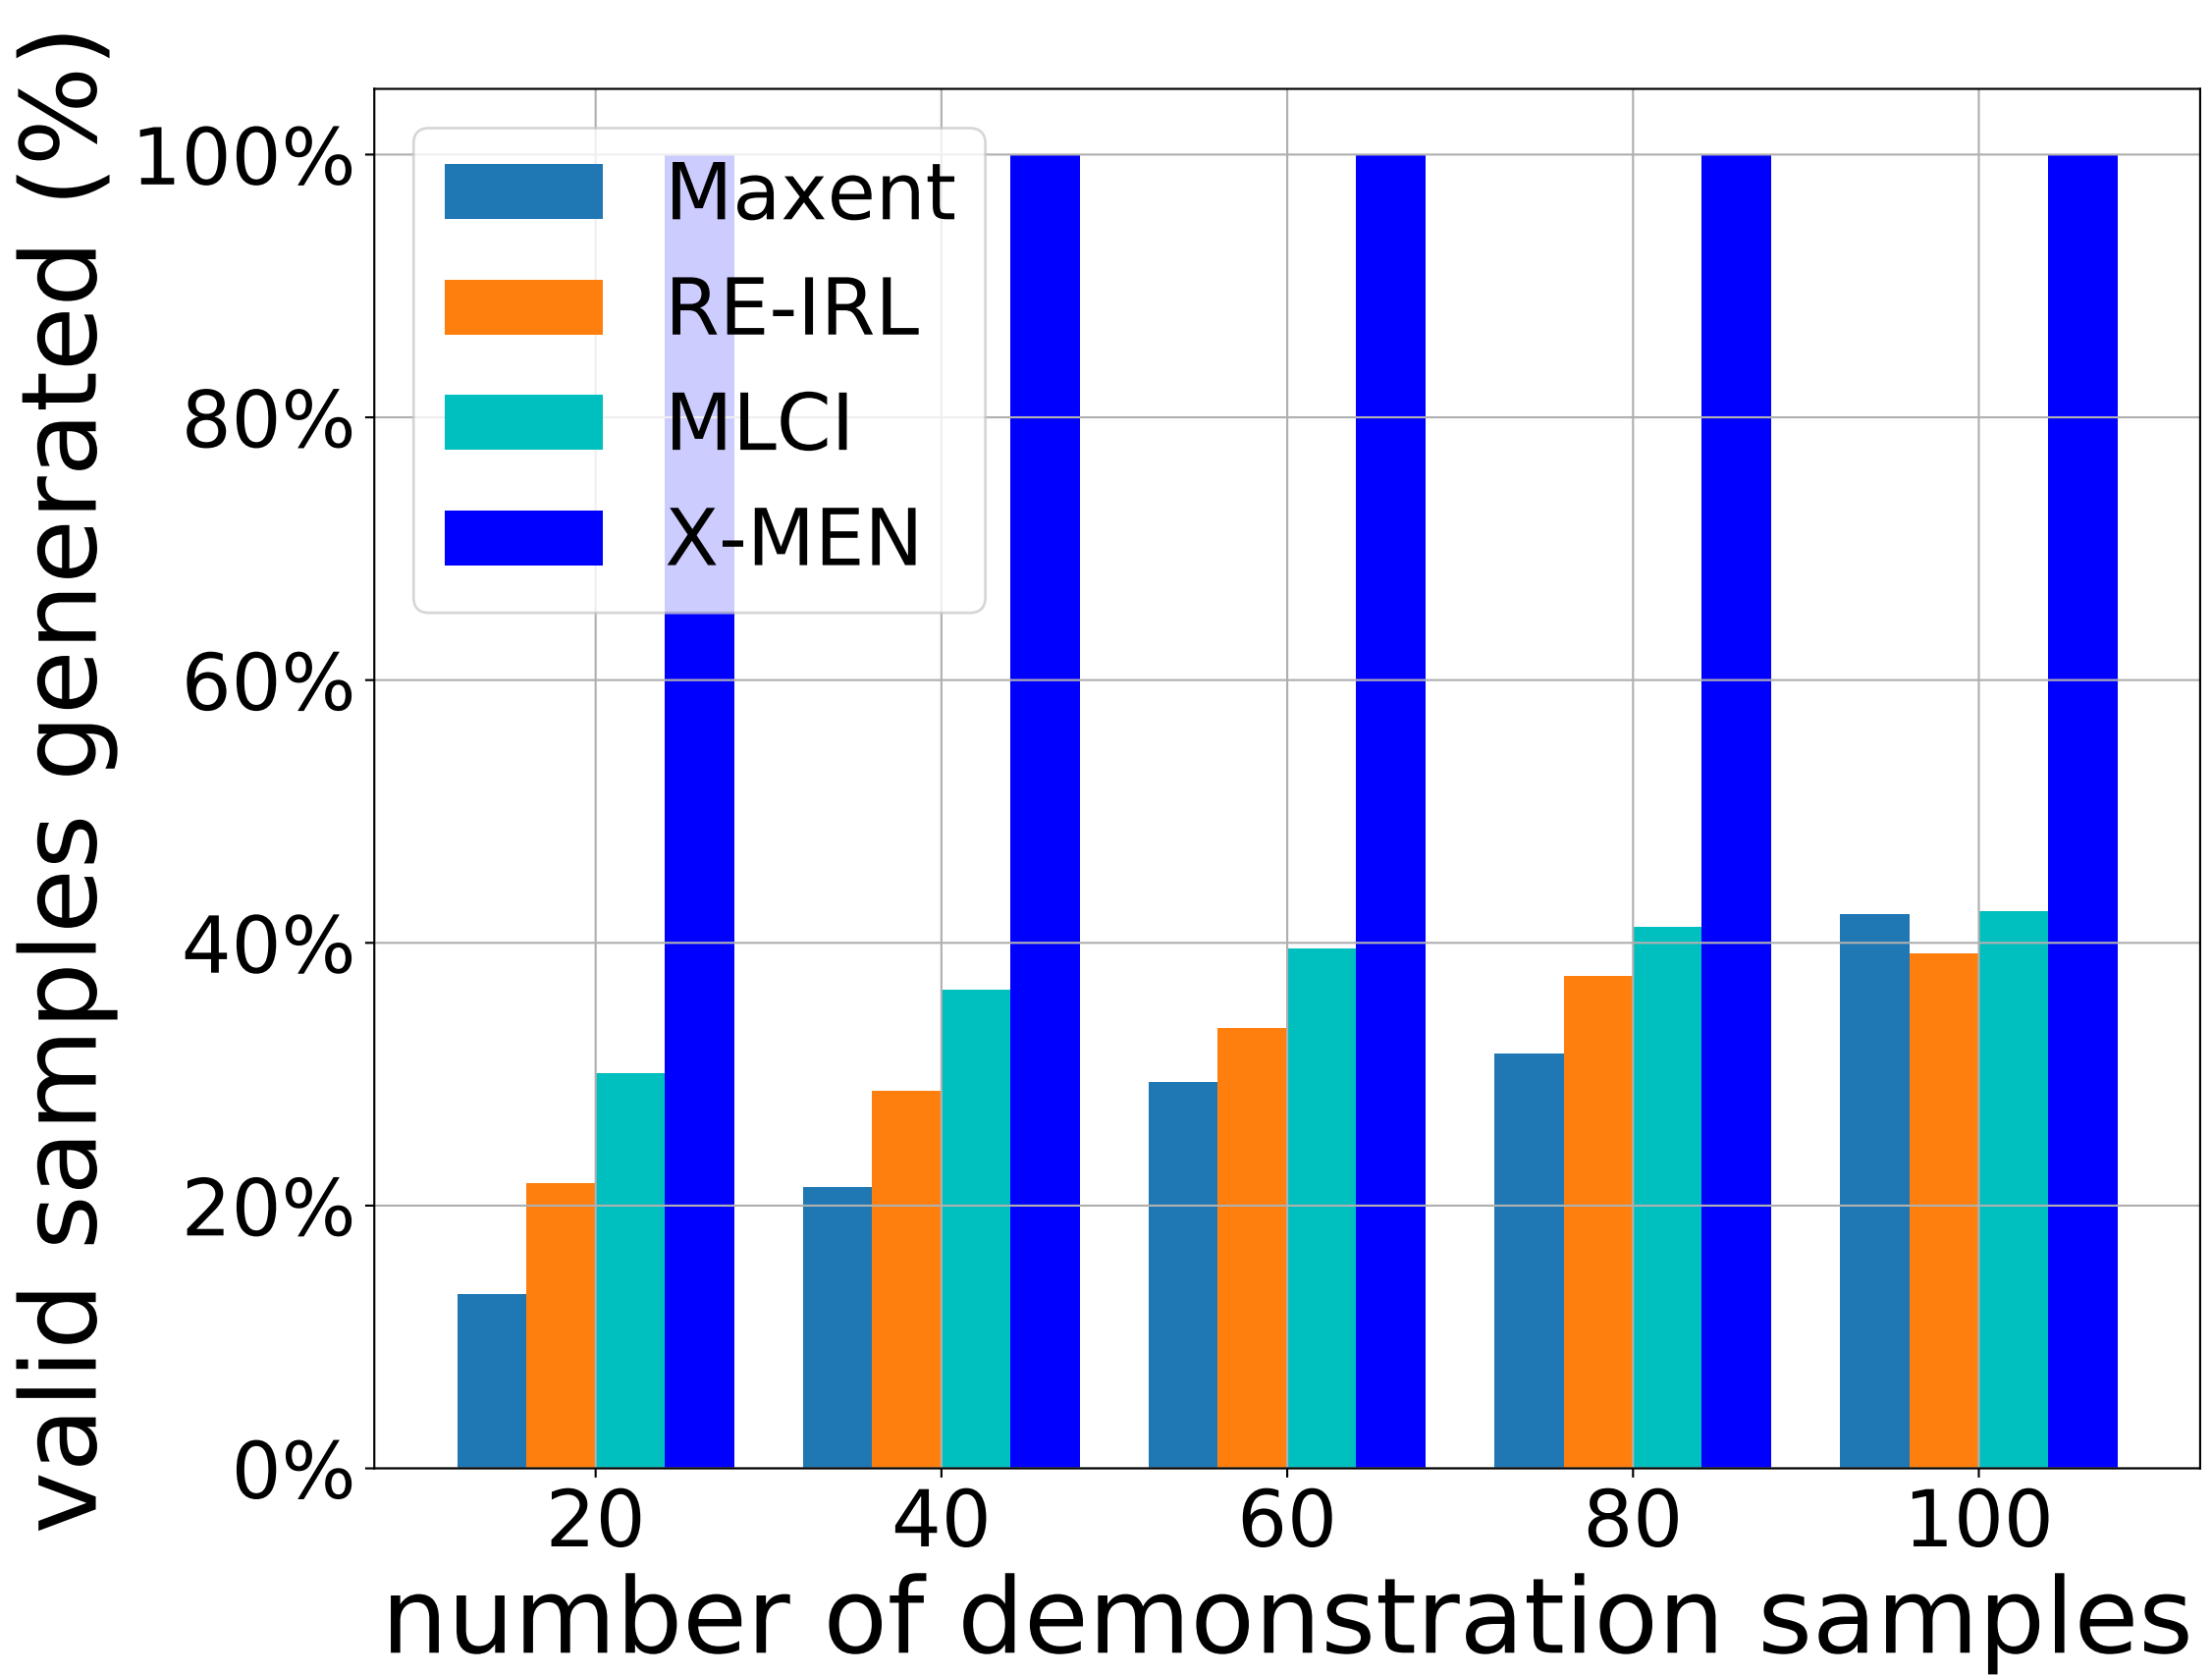

Supplement: supplementary_material [file attachment]

Distributions

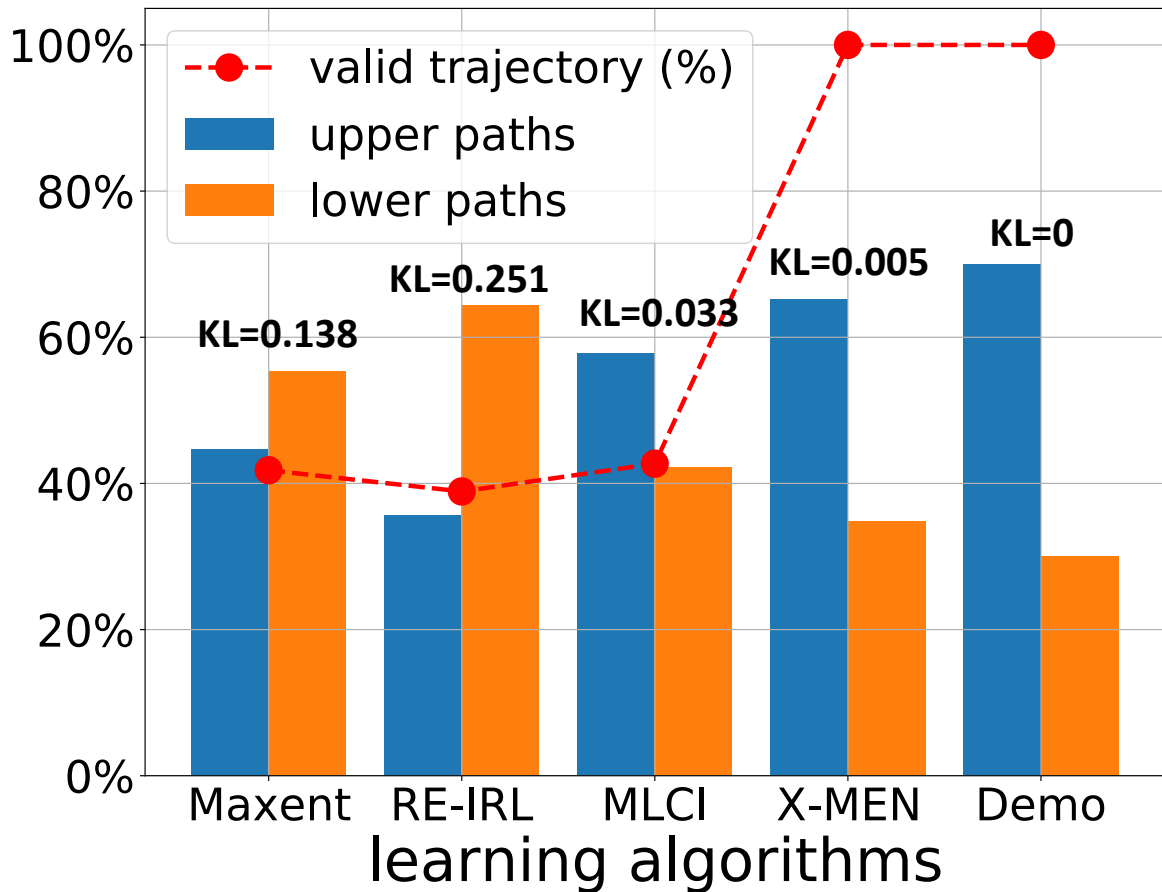

Supplement: supplementary_material [file attachment]

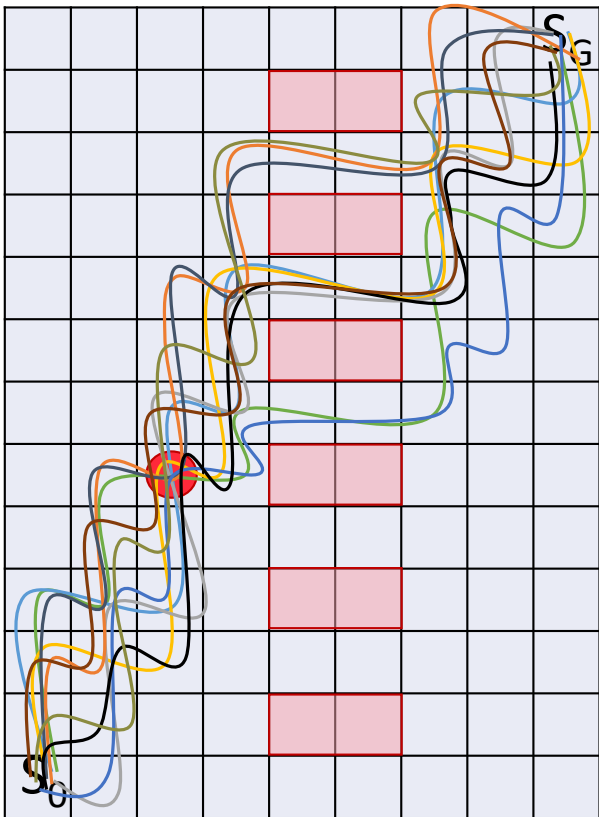

Supplement: supplementary_material [file attachment]

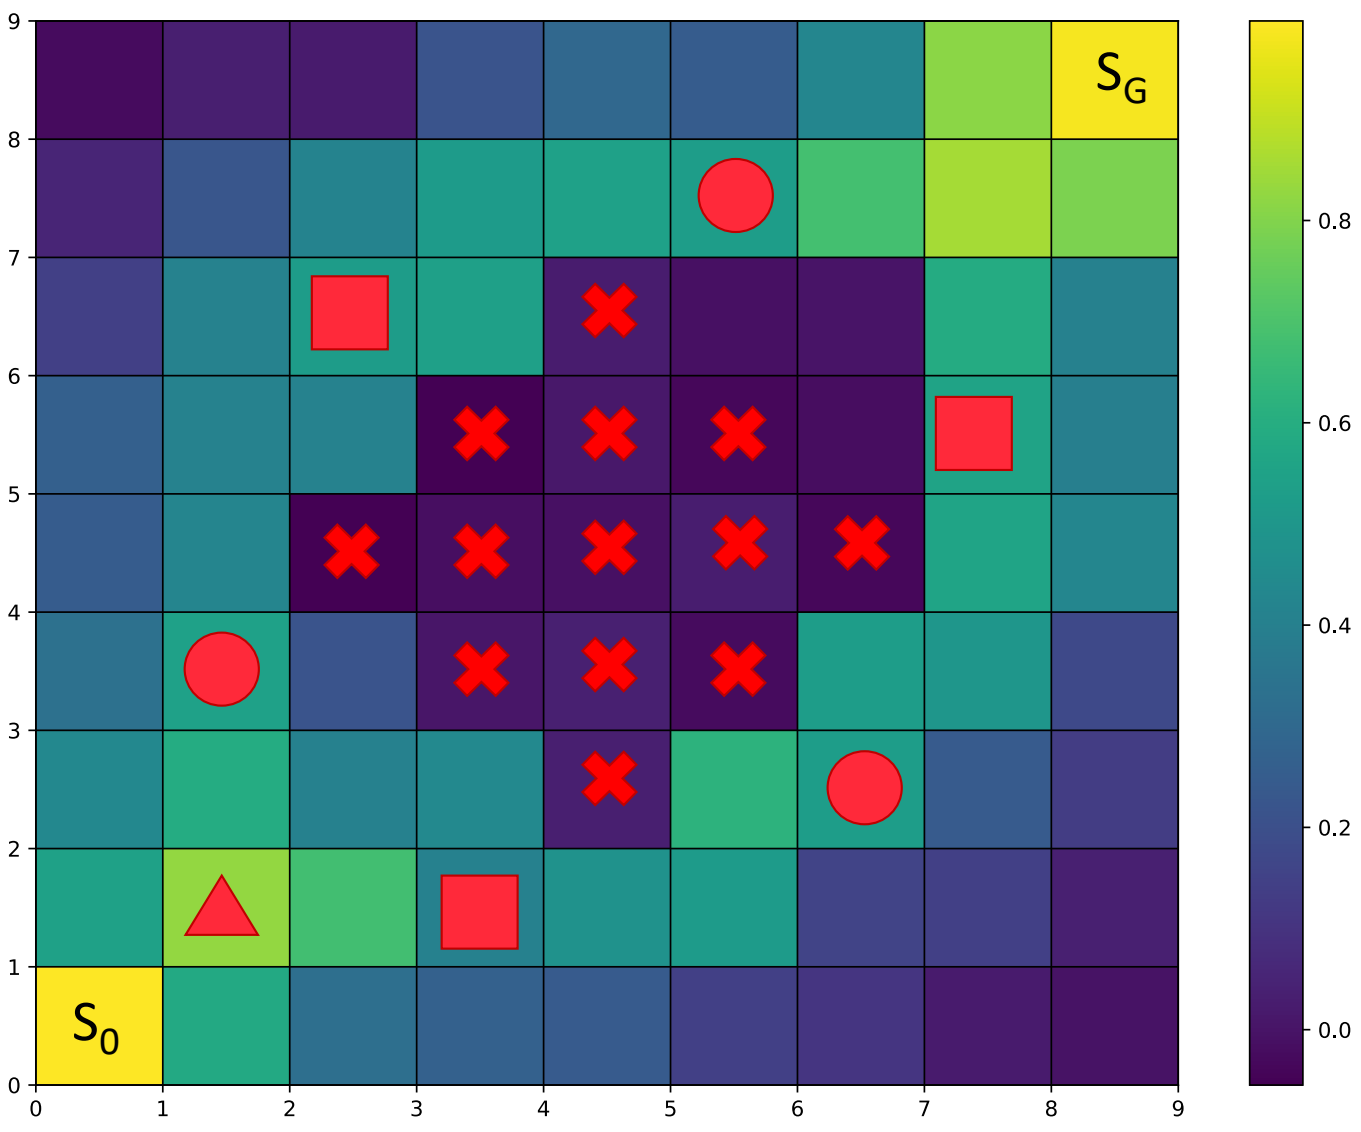

Supplement: supplementary_material [file attachment]
